# Supplementary material
Source: PubMed Central journal article supplement (PMC4223178)
Supplement: mmc1.pdf [file mmc1.pdf]

# Supporting Information

## Proton Transfer in the K-Channel Analogue of B-Type Cytochrome *c* Oxidase from *Thermus thermophilus*

Anna Lena Woelke, Anke Wagner, Gegham Galstyan, Tim Meyer, Ernst-Walter Knapp\*

Institute of Chemistry and Biochemistry, Freie Universität Berlin, D-14195 Berlin, Germany

\* corresponding author: E W Knapp, knapp@chemie.fu-berlin.de

### Table of content:

|                                                                                                            |     |
|------------------------------------------------------------------------------------------------------------|-----|
| Figure S1: RMSD of CcO backbone atoms                                                                      | S2  |
| Figure S2: RMSD of CcO of all protein atoms                                                                | S2  |
| Figure S3: RMSD of CcO of K-channel analogue residues                                                      | S3  |
| Figure S4: Hydrogen-bonding distances between polar oxygen atoms in the K-channel analogue                 | S4  |
| Figure S5: Hydrogen-bonding distances between polar oxygen atoms at the entrance of the K-channel analogue | S5  |
| Figure S6: Hydrogen-bonding distances between polar oxygen atoms in the middle of the K-channel analogue   | S6  |
| Table S1: Protonation states of the histidines at pH=7 in CcO                                              | S7  |
| Table S2: Geometry-optimized coordinates and atomic charges for the BNC cofactors                          | S8  |
| References                                                                                                 | S12 |

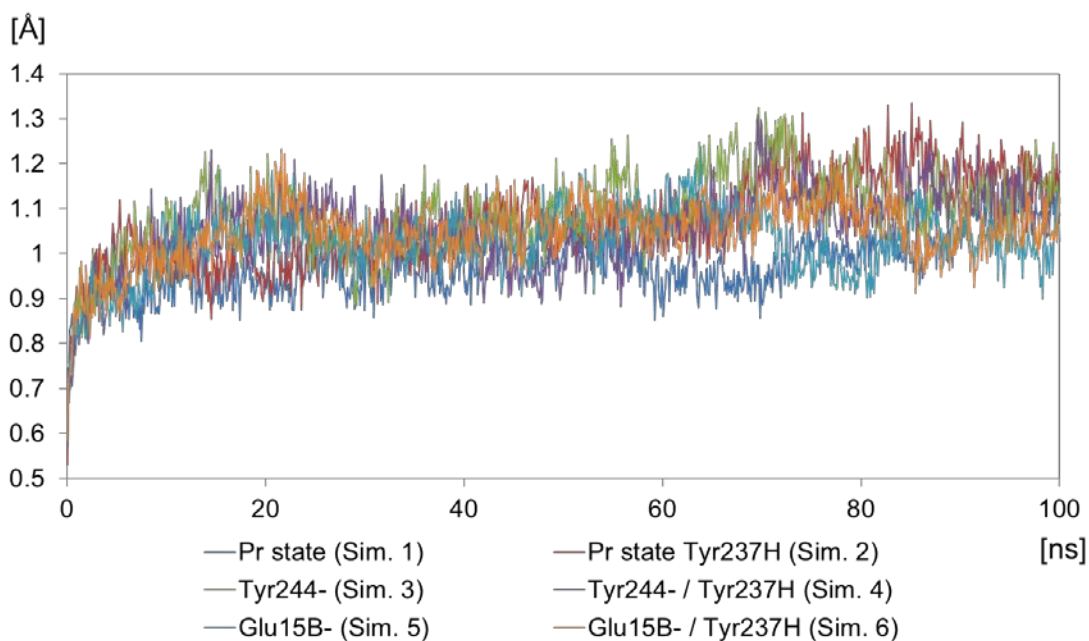

**Figure S1: Root mean square deviation (RMSD) of CcO backbone atoms** relative to the crystal structure PDB-id 3S8F [2] obtained by MD simulations for all simulations performed (for simulation details see Table I in main manuscript).

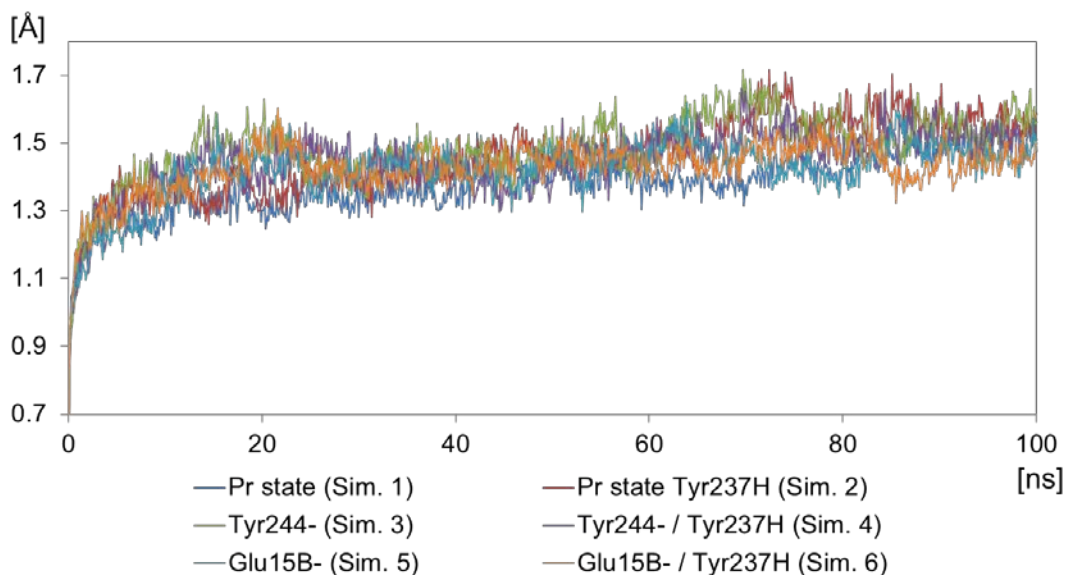

**Figure S2: Root mean square deviation (RMSD) of CcO of all protein atoms** relative to the crystal structure PDB-id 3S8F [2] obtained by MD simulations for all simulations performed (for simulation details see Table I in main manuscript).

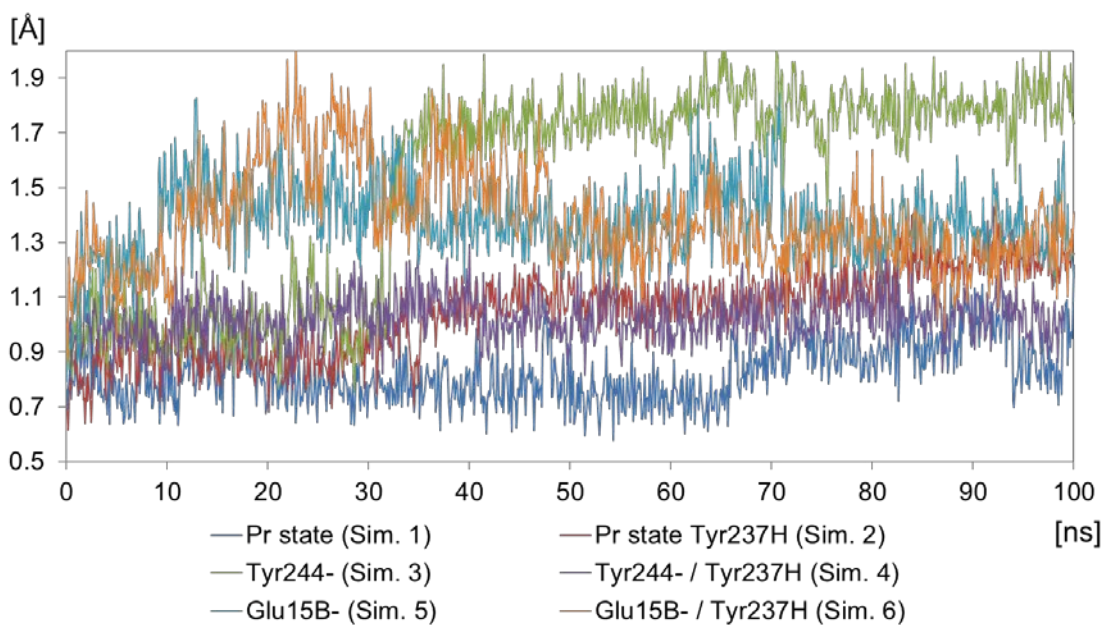

**Figure S3: Root mean square deviation (RMSD) of CcO of K-channel analogue residues.** MD simulation frames were aligned on the backbone atoms of the crystal structure (PDB-id 3S8F [2]). Then, RMSDs were measured for all atoms of the K-channel analogue residues (Tyr237, Ser309, Tyr244, Thr312, Tyr248, Thr315, Glu15B).

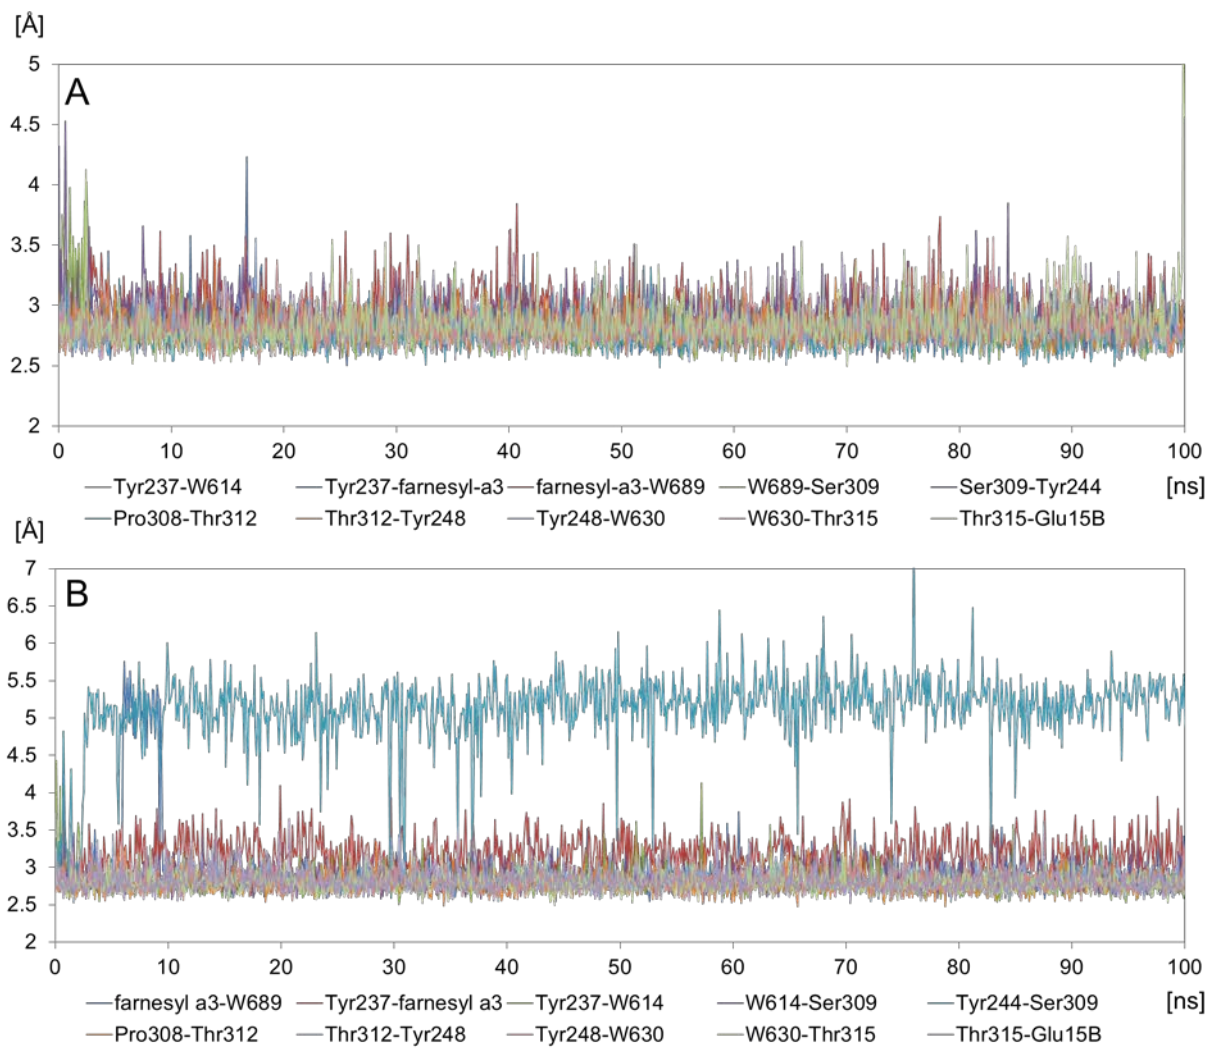

**Figure S4: Hydrogen-bonding distances between polar oxygen atoms in the K-channel analogue.** Distances between oxygen atoms were recorded for the 100 ns MD trajectory in (A)  $P_R$  state and (B) with Tyr237H (for simulation details see Table I, no. 1+2 in main manuscript).

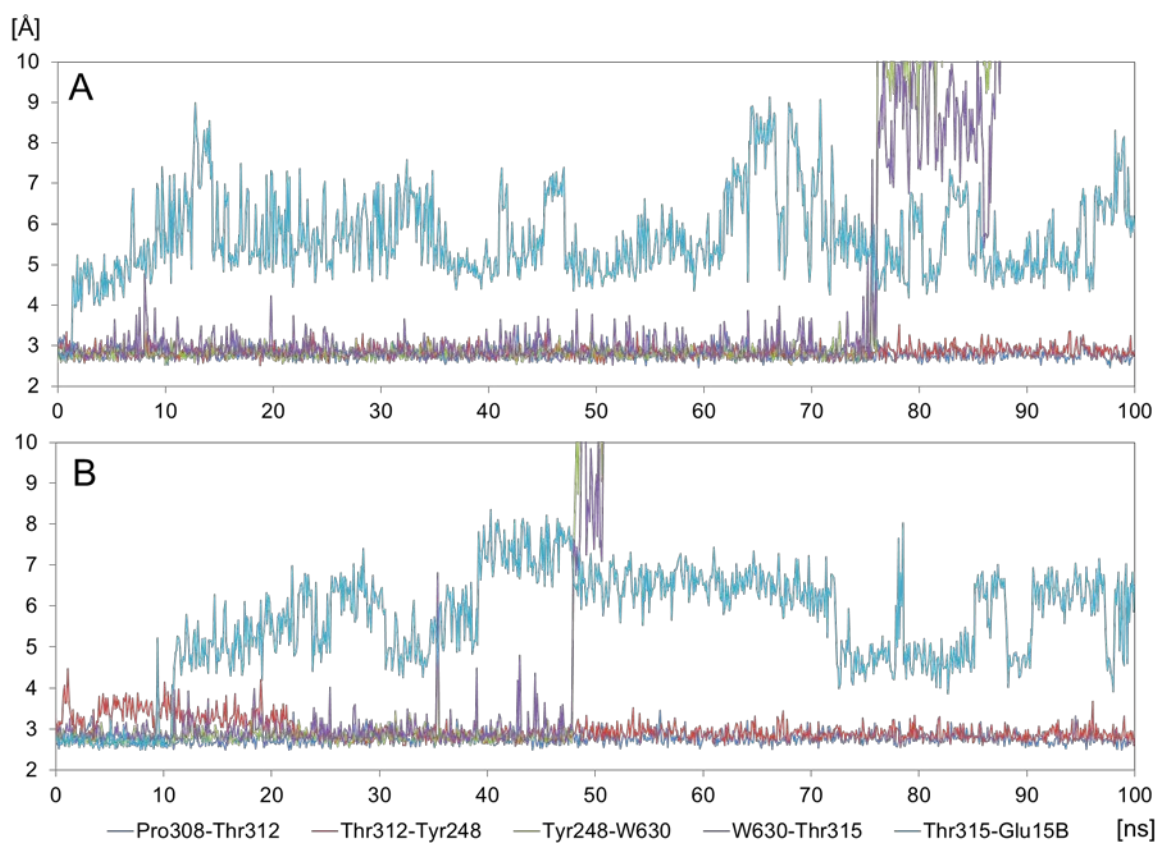

**Figure S5: Hydrogen-bonding distances between polar oxygen atoms at the entrance of the K-channel analogue.** Distances between oxygen atoms were recorded for the 100 ns MD trajectory with deprotonated Glu15B in (A)  $P_R$  state and (B) with Tyr237H (for simulation details see Table I, no. 5+6 in main manuscript).

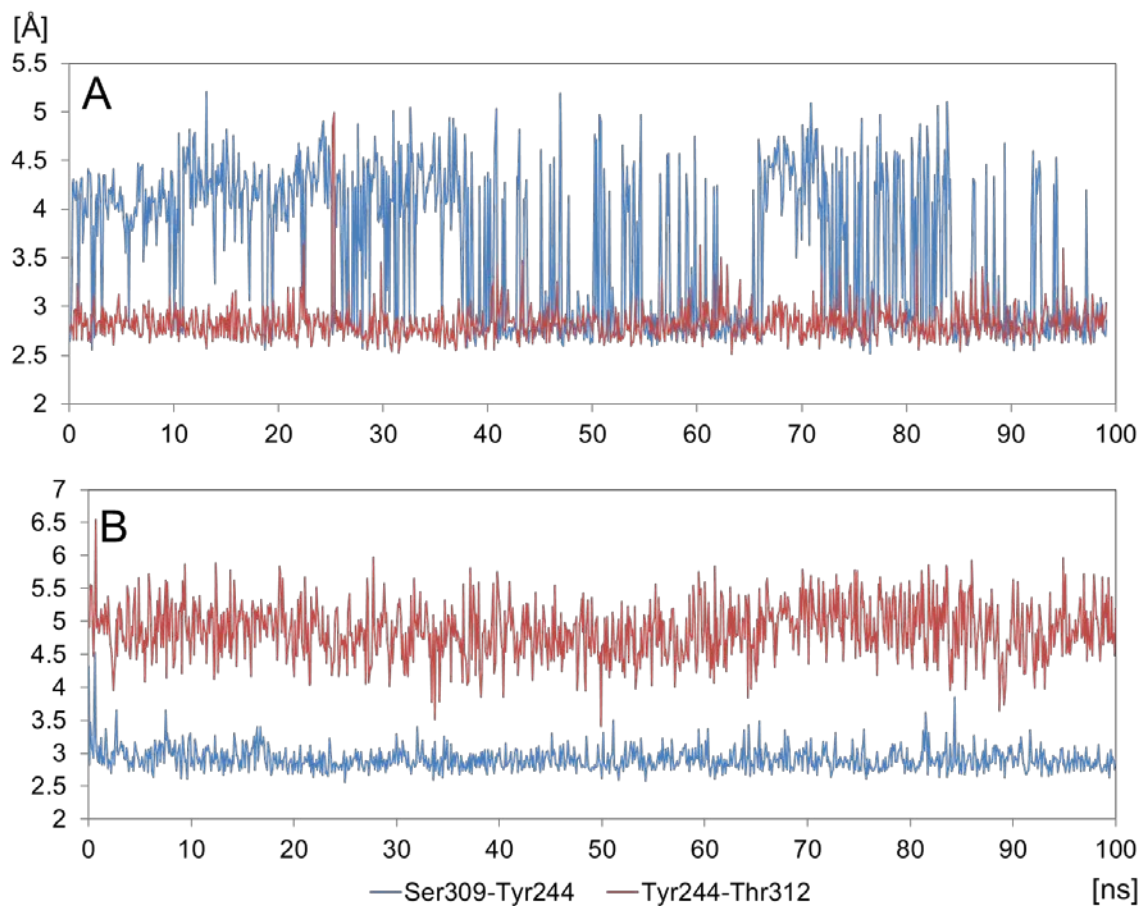

**Figure S6: Hydrogen-bonding distances between polar oxygen atoms in the middle of the K-channel analogue.** Distances between oxygen atoms were recorded for the 100 ns MD trajectory with (A) deprotonated Tyr244 and protonated Tyr237 and (B) in  $P_R$  state (for simulation details see Table I, no. 3+1 in main manuscript).

**Table S1: Protonation states of the histidines at pH=7 in CcO (PDB-id 2GSM).**

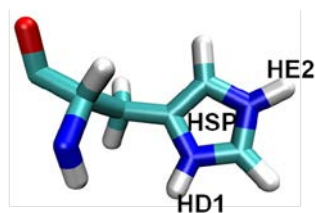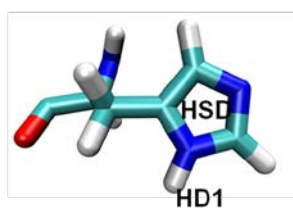

The different protonation states of histidine are called HSP, HSD and HSE in the CHARMM[1] program.

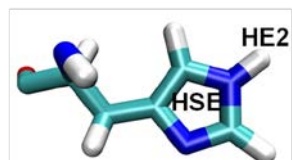

|         |         |         |         |         |         |         |         |         |         |
|---------|---------|---------|---------|---------|---------|---------|---------|---------|---------|
| AA      | 72 (A)  | 142 (A) | 233 (A) | 282 (A) | 283 (A) | 298 (A) | 376 (A) | 384 (A) | 386 (A) |
| HisType | HSD     | HSE     | HSE     | HSD     | HSD     | HSE     | HSP     | HSD     | HSD     |
| 440 (A) | 462 (A) | 552 (A) | 5 (B)   | 8 (B)   | 40 (B)  | 114 (B) | 117 (B) | 157 (B) |         |
| HSD     | HSE     | HSD     | HSE     | HSD     | HSE     | HSE     | HSE     | HSE     |         |

**Table S2: Geometry-optimized coordinates and atomic charges for the BNC cofactors.****a) CuA in oxidized state (used for all calculations)**

|     |                |                |               |           |
|-----|----------------|----------------|---------------|-----------|
| Cu1 | -30.3270214596 | 148.9184511061 | 13.7615419482 | 0.311997  |
| Cu2 | -28.4194902574 | 147.0332691630 | 14.5574729498 | 0.311997  |
| H3  | -25.2084464886 | 148.7142486770 | 14.3672519247 | 0.132877  |
| N4  | -26.4180447344 | 147.0350061074 | 13.7613730923 | -0.213947 |
| C5  | -25.2792104960 | 147.8039855783 | 13.7948458658 | 0.024317  |
| C6  | -26.3104004498 | 145.9874156863 | 13.0149433953 | 0.097385  |
| H7  | -27.0472576587 | 145.2276439342 | 12.8076710978 | 0.104494  |
| N8  | -25.0273624388 | 146.0202440434 | 12.5116533800 | -0.193361 |
| C9  | -24.3662249887 | 147.1531184579 | 12.9921076707 | -0.208905 |
| H10 | -23.3478442625 | 147.3702223383 | 12.7093699160 | 0.196572  |
| C11 | -30.6264341984 | 149.2368093769 | 16.9497028022 | -0.005121 |
| H12 | -30.4054167205 | 148.7254743565 | 17.8889034834 | 0.051160  |
| H13 | -31.5650897477 | 148.8611676073 | 16.5406165089 | 0.051160  |
| S14 | -29.2290393107 | 148.9763774079 | 15.7792855141 | -0.310848 |
| N15 | -29.0538688961 | 152.3462818304 | 14.3272468683 | -0.905063 |
| H16 | -29.1249085687 | 151.3658659433 | 14.5726316043 | 0.331005  |
| C17 | -28.6592991126 | 152.5455030526 | 12.9512767613 | 0.210796  |
| H18 | -28.7145301876 | 153.6090198907 | 12.6975313624 | 0.052321  |
| H19 | -27.6134786516 | 152.2410036342 | 12.8189304878 | 0.028775  |
| C20 | -29.5141552252 | 151.6904314385 | 11.9991776517 | 0.415545  |
| O21 | -29.5435779802 | 150.4575644807 | 12.1093223297 | -0.425493 |
| N22 | -30.4223645331 | 152.3424376739 | 11.2262762183 | -0.713060 |
| H23 | -30.3115998988 | 153.3212532065 | 11.0056001449 | 0.340823  |
| H24 | -30.9970633615 | 151.7859976103 | 10.6064085380 | 0.378953  |
| C25 | -28.7727473311 | 147.3833845238 | 11.2819231234 | 0.101646  |
| H26 | -28.3851671725 | 146.5076054906 | 10.7559089054 | 0.022120  |
| H27 | -27.9553689119 | 148.0159583505 | 11.6245714914 | 0.022120  |
| S28 | -29.8141884519 | 146.8154649626 | 12.6947431327 | -0.352773 |
| H29 | -33.2808170799 | 147.8994134365 | 12.8801623517 | 0.131131  |
| N30 | -32.2897306953 | 149.6188265009 | 13.7066361207 | -0.147998 |
| C31 | -33.3333857278 | 148.9529431160 | 13.1069528429 | -0.031274 |
| C32 | -32.6434209137 | 150.9186094890 | 13.8600279503 | -0.018683 |
| H33 | -31.9863883607 | 151.7192103060 | 14.1609385453 | 0.133179  |
| N34 | -33.8670035199 | 151.0708698156 | 13.3622134927 | -0.158875 |
| C35 | -34.3319449733 | 149.8509296044 | 12.8869753737 | -0.154431 |
| H36 | -35.3179097335 | 149.7535293719 | 12.4594951925 | 0.177053  |
| C37 | -28.8008645918 | 144.5433665465 | 17.5359531210 | -0.094367 |
| H38 | -29.8338392323 | 144.8572342928 | 17.3734838364 | 0.092250  |
| H39 | -28.5264599668 | 144.7327389645 | 18.5758743440 | 0.092250  |
| S40 | -27.7683885608 | 145.5455451624 | 16.4155875678 | -0.220580 |
| C41 | -26.0783119079 | 145.0085812476 | 16.8369832484 | -0.222799 |
| H42 | -25.4015144887 | 145.6254723219 | 16.2425678160 | 0.123502  |
| H43 | -25.8812513278 | 145.1873340764 | 17.8960677150 | 0.123502  |
| H44 | -25.9205965198 | 143.9567008975 | 16.5879251985 | 0.123502  |
| H45 | -24.6123510469 | 145.3410336601 | 11.8886099439 | 0.319269  |
| H46 | -34.4022407918 | 151.9283429563 | 13.3556921216 | 0.320702  |
| H47 | -29.7656802426 | 152.9419634016 | 14.7208235833 | 0.389642  |
| H48 | -30.6985977966 | 150.3070776053 | 17.1522811330 | 0.051160  |
| H49 | -29.3996092214 | 147.9516399790 | 10.5936179505 | 0.022120  |
| H50 | -28.7102417113 | 143.4791274433 | 17.3070069628 | 0.092250  |

**b) heme a in oxidized state (used for all calculations)**

|     |               |               |               |           |
|-----|---------------|---------------|---------------|-----------|
| H1  | 1.0239320577  | -1.3183000967 | 38.9398941612 | 0.181210  |
| C2  | 1.4909700298  | -2.1324224093 | 38.4082267686 | -0.126252 |
| N3  | 2.4668918501  | -2.9237006327 | 39.0000844501 | -0.204047 |
| C4  | 1.2861378809  | -2.6540293935 | 37.1656361891 | -0.136193 |
| C5  | 2.8746383679  | -3.8623337411 | 38.1188188228 | -0.004414 |
| N6  | 2.1887508740  | -3.7038229060 | 37.0079671504 | 0.023538  |
| H7  | 3.3010617514  | -7.6716097547 | 31.0262020711 | 0.183593  |
| C8  | 2.8189386081  | -7.0847620378 | 31.7920567270 | -0.118088 |
| N9  | 1.4768473618  | -6.7487184046 | 31.7139378525 | -0.212660 |
| C10 | 3.2757388779  | -6.5531276053 | 32.9675072483 | -0.203911 |
| C11 | 1.1211226057  | -6.0245334916 | 32.7849481888 | -0.007644 |
| N12 | 2.1757196738  | -5.8833510427 | 33.5439998740 | 0.091744  |
| C13 | -1.2033153115 | -3.8952969679 | 34.7482843924 | -0.333782 |
| C14 | 1.0683498935  | -7.7360338829 | 36.8568703076 | -0.215239 |
| C15 | 5.5237873650  | -5.7221106855 | 36.2039619395 | -0.212895 |



C16 3.2880141988 -2.3070323447 33.4493402981 -0.167627  
 C17 -0.8764851168 -5.1961099437 35.3457753388 0.199004  
 C18 -1.8233223516 -6.2856272242 35.4378607023 -0.327948  
 C19 -1.2429350809 -7.2886238244 36.0795785368 0.222301  
 C20 0.1202440891 -6.9210944822 36.2681782075 0.065534  
 C21 -1.8264598055 -8.6265806947 36.4280023243 -0.360348  
 H22 -2.8629855560 -6.2001035017 35.1433657427 0.178094  
 C23 2.4403890906 -7.4095341963 36.9145825438 0.122940  
 C24 3.4545716847 -8.2428732404 37.5502690519 0.057027  
 C25 4.6855252720 -7.6285874638 37.4710702589 -0.005936  
 C26 4.4177819827 -6.4252747661 36.6297624112 0.096625  
 C27 3.1206281311 -9.4520075595 38.3799785215 -0.295983  
 C28 5.9908924779 -8.0940867938 37.9343020613 -0.101349  
 C29 6.2508615605 -8.6390349075 39.1317923800 -0.319434  
 C30 5.2927391525 -4.6809894736 35.1270879572 0.028820  
 C31 6.1902587286 -3.7680275644 34.8045987395 0.102032  
 C32 5.6135142001 -2.9276240257 33.7719798447 0.054588  
 C33 4.2854766480 -3.1099013493 34.0684863600 0.039909  
 C34 7.6814172627 -3.9478418006 34.9632157130 -0.302515  
 C35 6.1880366110 -1.8085038431 33.0423748568 -0.137651  
 C36 7.4852979481 -1.5995773340 32.7586685527 -0.301693  
 C37 1.9841093651 -2.4706336464 33.6606378982 0.134036  
 C38 0.9696371805 -1.4641848169 33.2148692074 0.086746  
 C39 -0.2914101054 -1.9201908563 33.6367409301 -0.324167  
 C40 -0.0831411170 -3.1818975699 34.2985367627 0.238467  
 C41 1.2140368575 -0.3478005172 32.2433300212 -0.292696  
 H42 -1.2466043426 -1.4523509067 33.4352140027 0.176273  
 N43 0.4488573285 -5.6781516584 35.6588858845 -0.276989  
 N44 3.0986426869 -6.3168742427 36.4000216410 -0.276989  
 N45 3.9187898095 -4.2543203730 34.8720651383 -0.276989  
 N46 1.2361344097 -3.3832150463 34.2856998002 -0.276989  
 Fe47 2.1751087947 -4.8471192658 35.3013198502 0.425000  
 H48 3.6397265093 -4.5970138349 38.3053640219 0.165195  
 H49 0.6146164615 -2.3374821273 36.3912458139 0.159761  
 H50 2.8430697625 -2.7919136913 39.9280966895 0.328887  
 H51 4.2467451855 -6.5573114858 33.4300010250 0.208630  
 H52 0.1355122674 -5.6284978918 32.9649365663 0.154493  
 H53 0.8633838827 -7.0028468966 30.9525158105 0.331262  
 H54 0.7600638035 -8.6704523913 37.3064450892 0.149311  
 H55 3.5870562216 -1.4559726303 32.8553294127 0.123769  
 H56 6.5144645763 -5.9699224250 36.5474862973 0.159482  
 H57 -2.2148318142 -3.5576469344 34.5826922848 0.198560  
 H58 7.7878610479 -0.7104617433 32.2147749139 0.147502  
 H59 8.2731175650 -2.2929914264 33.0225151671 0.159937  
 H60 5.4857200706 -1.0615661919 32.6816602697 0.140246  
 H61 7.2570469372 -8.9496295613 39.3957844083 0.151779  
 H62 5.4862963802 -8.7680336755 39.8914043546 0.161680  
 H63 6.8266151829 -7.9505769088 37.2503030047 0.123733  
 H64 4.0100335071 -10.0638624727 38.5495863659 0.098044  
 H65 2.7327612910 -9.1636237884 39.3650748215 0.098044  
 H66 2.3689667545 -10.0915887293 37.9047498233 0.098044  
 H67 8.1660145356 -2.9956206190 35.2032700204 0.100690  
 H68 7.9384912620 -4.6471427722 35.7621634222 0.100690  
 H69 8.1319283170 -4.3239521776 34.0382515860 0.100690  
 H70 -1.7381775272 -8.8385647174 37.4993707519 0.116140  
 H71 -2.8878358844 -8.6613100376 36.1705969314 0.116140  
 H72 -1.3216482278 -9.4381362872 35.8919764633 0.116140  
 H73 0.3003409076 0.2268552205 32.0703620493 0.101366  
 H74 1.9848331649 0.3546700968 32.5842350113 0.101366  
 H75 1.5444352287 -0.7431634898 31.2747706025 0.101366

**c) heme a3 in state Fe(IV)=O (used for all calculations)**

H38 -5.6190862081 -37.1675029949 20.5613171826 0.157824  
 N39 -6.8442915675 -36.1095730724 21.9895348831 -0.207126  
 H40 -7.6268375641 -36.7394697787 22.0790002153 0.316613  
 C41 -5.7335756117 -36.2909980218 21.1794846745 -0.138747  
 C42 -6.7010807601 -34.9238803102 22.6259582968 0.126215  
 H43 -7.4049957889 -34.5116211504 23.3320808668 0.105198  
 N44 -5.5503090507 -34.3588445223 22.2633277446 -0.335061  
 C45 -4.9452440472 -35.1883148349 21.3642905634 0.009826  
 H46 -3.9944289009 -34.9449101126 20.9190309940 0.086811  
 H47 0.2104785816 -34.9125771942 23.4328657543 0.160168

Fe48 -4.5184204499 -32.6416521663 22.8989580956 0.562061  
 N49 -2.8648006690 -33.7281769651 23.5761712994 -0.176399  
 N50 -5.3538540863 -32.7407635446 24.8568666373 -0.150605  
 N51 -5.9981861510 -31.3041549976 22.3726331576 -0.128398  
 N52 -3.5098871971 -32.2565793661 21.1056674638 -0.143865  
 C53 -1.7169820310 -33.9358358875 22.8478186742 0.206583  
 C54 -0.7880789194 -34.5975744229 23.7155774277 -0.290598  
 C55 -1.3746727485 -34.7646064123 24.9451906915 -0.063552  
 C56 -2.6944957702 -34.2251146125 24.8564708510 0.141559  
 C57 -4.8681833255 -33.5332831366 25.8795556988 0.067069  
 C58 -5.8658039558 -33.5129892003 26.9273318970 0.103347  
 C59 -6.9007876164 -32.7165331703 26.5310038895 -0.244257  
 C60 -6.5700017633 -32.2272437564 25.1999903716 0.123513  
 C61 -7.0682504703 -30.9200853988 23.1543873432 -0.017331  
 C62 -7.8484796438 -29.9605157689 22.4099332908 0.121088  
 C63 -7.2568045052 -29.7793826608 21.2031439710 -0.017751  
 C64 -6.0791782061 -30.6262827956 21.1599354178 0.044192  
 C65 -3.9463843793 -31.4023295552 20.1319859056 0.040356  
 C66 -2.9222565032 -31.3503961606 19.1140617013 0.167079  
 C67 -1.8971720724 -32.1559626221 19.5033762582 -0.385701  
 C68 -2.2764200639 -32.7262818211 20.7697046249 0.232631  
 C69 -1.5084520632 -33.5986734494 21.5199937226 -0.272957  
 H70 -0.5642673621 -33.9143238441 21.0845843150 0.140189  
 C71 -3.6557684319 -34.2007007233 25.8690995714 -0.212156  
 H72 -3.3668655714 -34.7215607305 26.7754817657 0.154845  
 C73 -7.3508851258 -31.3797296227 24.4232413008 -0.170412  
 H74 -8.2513585223 -31.0123450454 24.8996544773 0.158541  
 C75 -5.1727804438 -30.7339681631 20.1287022193 -0.173241  
 H76 -5.3804094412 -30.1468408745 19.2396427284 0.123366  
 C77 -0.7203503779 -35.3821699896 26.0968366526 0.401299  
 H78 0.2265947671 -35.9117239622 25.8461089048 -0.020246  
 O79 -1.1043938401 -35.3280839796 27.2558809620 -0.434365  
 C80 -5.7514258601 -34.2579373433 28.2295129919 -0.317330  
 H81 -4.7245613363 -34.5749254799 28.4271077037 0.104881  
 H82 -6.3742225561 -35.1614413140 28.2337424518 0.078587  
 H83 -6.0742325566 -33.6439578606 29.0778891479 0.111725  
 C84 -9.0845923040 -29.2873417000 22.9300720215 -0.278931  
 H85 -9.1282162297 -28.2434647254 22.6031701617 0.098724  
 H86 -9.1166819348 -29.2956137384 24.0230636382 0.077371  
 H87 -9.9993755422 -29.7844369728 22.5824207187 0.082733  
 C88 -7.6499638239 -28.9027824467 20.1007983288 -0.083917  
 H89 -6.8378605767 -28.5861745273 19.4469330884 0.121726  
 C90 -8.8730359307 -28.4174290989 19.8345425230 -0.378785  
 H91 -9.0308815006 -27.7465306164 18.9954392673 0.146703  
 H92 -9.7565007008 -28.7127535234 20.3888194855 0.158767  
 C93 -2.9973778799 -30.5271309401 17.8598757756 -0.300927  
 H94 -3.0532303148 -29.4538695223 18.0792403279 0.095647  
 H95 -3.8803334318 -30.7804087529 17.2598835186 0.078603  
 H96 -2.1151961718 -30.6908857339 17.2343759044 0.097210  
 C97 -8.0998014255 -32.3290711967 27.3565826724 0.319502  
 H98 -7.9081735958 -32.5670307831 28.4131962024 -0.016557  
 O99 -8.4723804561 -30.9546555075 27.2234886252 -0.613663  
 H100 -7.6842528621 -30.4249545479 27.4062866800 0.391412  
 H101 -8.9966290949 -32.8820456318 27.0496103428 0.034867  
 H102 -0.9698969828 -32.3452916349 18.9777700864 0.176710  
 O104 -3.7173545313 -31.3470686937 23.4935894406 -0.352657

**d) CuB in PR state with Cu(II)-OH Tyr237-O- (used for Tyr237 deprotonated)**

H1 -0.8264348977 -26.9346109600 26.1064242774 0.114395  
 N2 -2.2615098291 -28.5572664326 25.9604539222 -0.272336  
 C3 -1.8463080878 -27.2596556179 26.2418658027 -0.150851  
 C4 -3.5420971306 -28.6758556889 26.2606412562 0.239017  
 H5 -4.2047558321 -29.5248796211 26.1757183499 0.073658  
 N6 -4.0075359556 -27.4746763060 26.6779303239 0.018397  
 C7 -2.9594099957 -26.5594534038 26.6421526776 -0.139733  
 H8 -3.0851688944 -25.5565598424 27.0152909734 0.104747  
 H9 -7.4669767381 -24.5607221949 25.8510568872 0.096415  
 C10 -7.1688404465 -25.5584168702 26.1647318218 -0.355662  
 C11 -8.1455072571 -26.5516344439 26.3458615786 -0.025632  
 H12 -9.1974766433 -26.3140259532 26.2026918731 0.065093  
 C13 -7.7482593517 -27.8206578078 26.7208140444 -0.352689

H14 -8.4567905795 -28.6277836644 26.8823833952 0.101035  
 C15 -6.3642335389 -28.1607556020 26.8967965953 0.468574  
 O16 -5.9999644106 -29.3344808020 27.2440125686 -0.663003  
 C17 -5.8139427879 -25.8303667570 26.3081465185 -0.047149  
 H18 -5.0892850961 -25.0611900854 26.0485474013 0.091091  
 C19 -5.3883832049 -27.1014775020 26.7276621459 -0.156292  
 H20 0.7852770016 -33.3204222733 28.4027251972 0.151168  
 N21 -0.7357574042 -31.8060817970 28.5174237514 -0.138017  
 H22 -0.9905625006 -31.8829941978 29.4918222852 0.276540  
 C23 0.2228504796 -32.5635976410 27.8780136765 -0.274163  
 C24 -1.3050648697 -30.9706270807 27.6300361874 0.122950  
 H25 -2.0769605107 -30.2493471192 27.8480220333 0.070911  
 N26 -0.7548904222 -31.1951466430 26.4312355829 -0.347171  
 C27 0.2014882313 -32.1910163383 26.5710586696 0.066167  
 H28 0.7862817376 -32.5415473094 25.7365729296 0.093837  
 H29 3.7200734096 -31.2644666827 23.6833759693 0.099653  
 N30 1.9002902498 -31.5525148359 22.5596236380 -0.247127  
 H31 2.2419632600 -32.1739304486 21.8404850570 0.274181  
 C32 2.6731337940 -31.0195297081 23.5882368589 -0.084616  
 C33 0.6629101046 -31.0570231261 22.6444618907 0.048863  
 H34 -0.1651386774 -31.2846729282 21.9914555394 0.153108  
 N35 0.6137614190 -30.2121193382 23.6871710819 -0.100284  
 C36 1.8581144913 -30.1821177181 24.2830129771 -0.176187  
 H37 2.0642151958 -29.5799968425 25.1542071162 0.134585  
 Cu103 -1.0845506669 -29.8341269628 24.8938509096 0.345165  
 O106 -1.7536237560 -29.0975303164 23.2951111386 -1.015467  
 H107 -2.0035987608 -28.1759530489 23.4461681401 0.336828

**e) CuB in PR state with Cu(II)-OH Tyr237-OH (used for Tyr237 protonated)**

H1 -0.8903030011 -26.9122738263 26.1209729916 0.163635  
 N2 -2.2944940036 -28.5611061666 25.9699135968 -0.278232  
 C3 -1.9042401272 -27.2567284765 26.2489171452 -0.090344  
 C4 -3.5629998273 -28.7017951339 26.2571793843 0.114349  
 H5 -4.1555995250 -29.5928522102 26.1474667632 0.102382  
 N6 -4.0697007471 -27.5087776324 26.6699145053 0.115890  
 C7 -3.0311687802 -26.5748483892 26.6373482137 -0.178669  
 H8 -3.1643250919 -25.5708792226 27.0043431557 0.178374  
 H9 -7.4289088137 -24.4878232579 25.8404578774 0.143010  
 C10 -7.1677891328 -25.4920844851 26.1555426415 -0.156157  
 C11 -8.1532012886 -26.4580572992 26.3452393144 -0.046268  
 H12 -9.2010846602 -26.2104477308 26.2097203661 0.132988  
 C13 -7.7974924142 -27.7498716023 26.7265000525 -0.251665  
 H14 -8.5623231913 -28.5071009605 26.8828991695 0.148767  
 C15 -6.4586858996 -28.1008086512 26.8894203036 0.255685  
 O16 -6.0817660469 -29.3642035986 27.2643312960 -0.514649  
 C17 -5.8258681756 -25.8433330865 26.3050153643 -0.130014  
 H18 -5.0605022373 -25.1208508519 26.0473666949 0.142600  
 C19 -5.4570884075 -27.1219376779 26.7247512580 0.007477  
 H20 0.8816957634 -33.3136059777 28.3882102465 0.182608  
 N21 -0.6722779252 -31.8329388865 28.5058845328 -0.159156  
 H22 -0.9231420263 -31.9243597913 29.4806466206 0.319914  
 C23 0.3037379213 -32.5667058229 27.8661568171 -0.148849  
 C24 -1.2572878384 -31.0061882653 27.6199517629 0.065660  
 H25 -2.0434563230 -30.3068276519 27.8476507982 0.128051  
 N26 -0.6989880281 -31.2141920885 26.4215024389 -0.275759  
 C27 0.2781578347 -32.1892493218 26.5585397689 -0.003117  
 H28 0.8732574990 -32.5246893992 25.7253295240 0.111948  
 H29 3.7403608534 -31.2684578974 23.6634306582 0.154390  
 N30 1.9002898232 -31.5594265318 22.5739080537 -0.191458  
 H31 2.2255561008 -32.1901799057 21.8541887948 0.316181  
 C32 2.6929735597 -31.0204729792 23.5826282592 -0.074571  
 C33 0.6673097257 -31.0564169619 22.6763088870 0.081909  
 H34 -0.1710067264 -31.2888561002 22.0381824965 0.176658  
 N35 0.6401165951 -30.2000763563 23.7120840579 -0.220788  
 C36 1.8964372889 -30.1715901007 24.2847790246 -0.096136  
 H37 2.1260542437 -29.5638892556 25.1459890337 0.152475  
 Cu103 -1.0521976077 -29.8551141939 24.8881634956 0.593722  
 O106 -1.7456079573 -29.1113523064 23.3121095522 -0.760961  
 H107 -2.0223354844 -28.1942349722 23.4410356975 0.367948  
 H41 -6.8166525527 -29.9729106423 27.1083927072 0.420178

## References

1. Brooks, B.R., et al., *CHARMM: A Program for Macromolecular Energy, Minimization, and Dynamics Calculations*. J. Comput. Chem., 1983. **4**(2): p. 187-217.
2. Tiefenbrunn, T., et al., *High Resolution Structure of the ba3 Cytochrome c Oxidase from Thermus thermophilus in a Lipidic Environment*. PLoS One, 2011. **6**(7): p. e22348.
